# Supplementary material for: Comparative Mitogenomics of Flesh Flies: Implications for Phylogeny
Source: MDPI journal article supplement (doi:10.3390/insects13080718), 2022-08-10
Supplement: s1 [file s1]

## Supplementary Materials

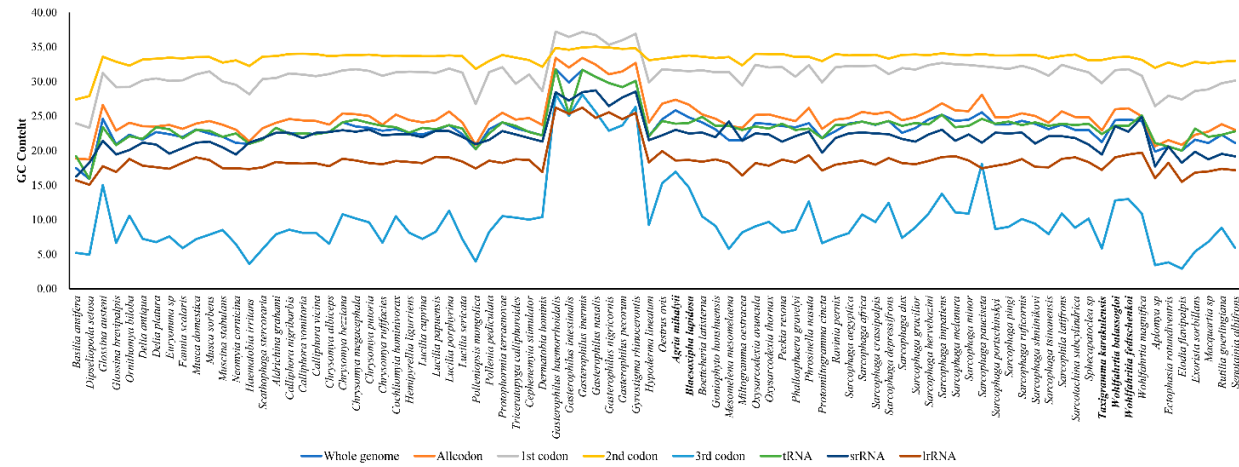

**Figure S1.** GC content of 13 mitochondrial protein-coding genes in Calyptratae. (GC: Guanine and Cytosine). The sequences for species with names in bold were generated in this study.

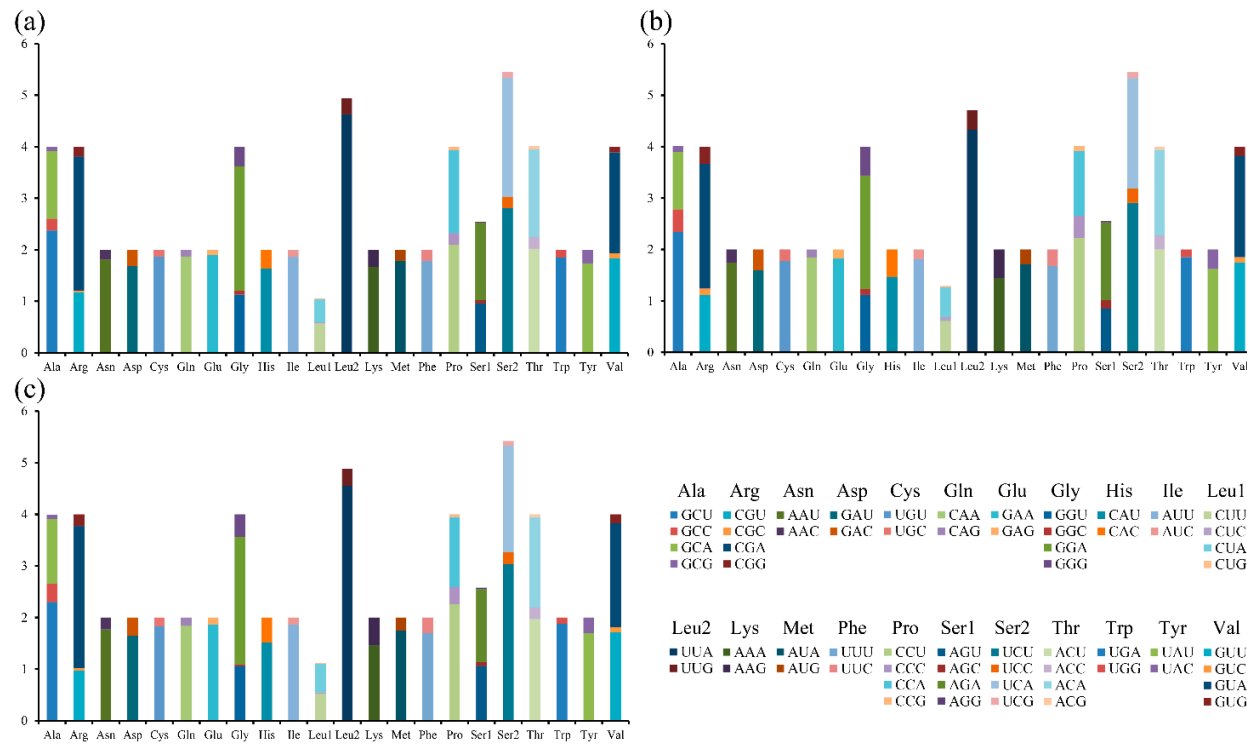

**Figure S2.** Codon usage analysis of the mitochondrial genomes from three subfamilies (a: Miltogrammatinae, b: Paramacronychiinae and c: Sarcophaginae).

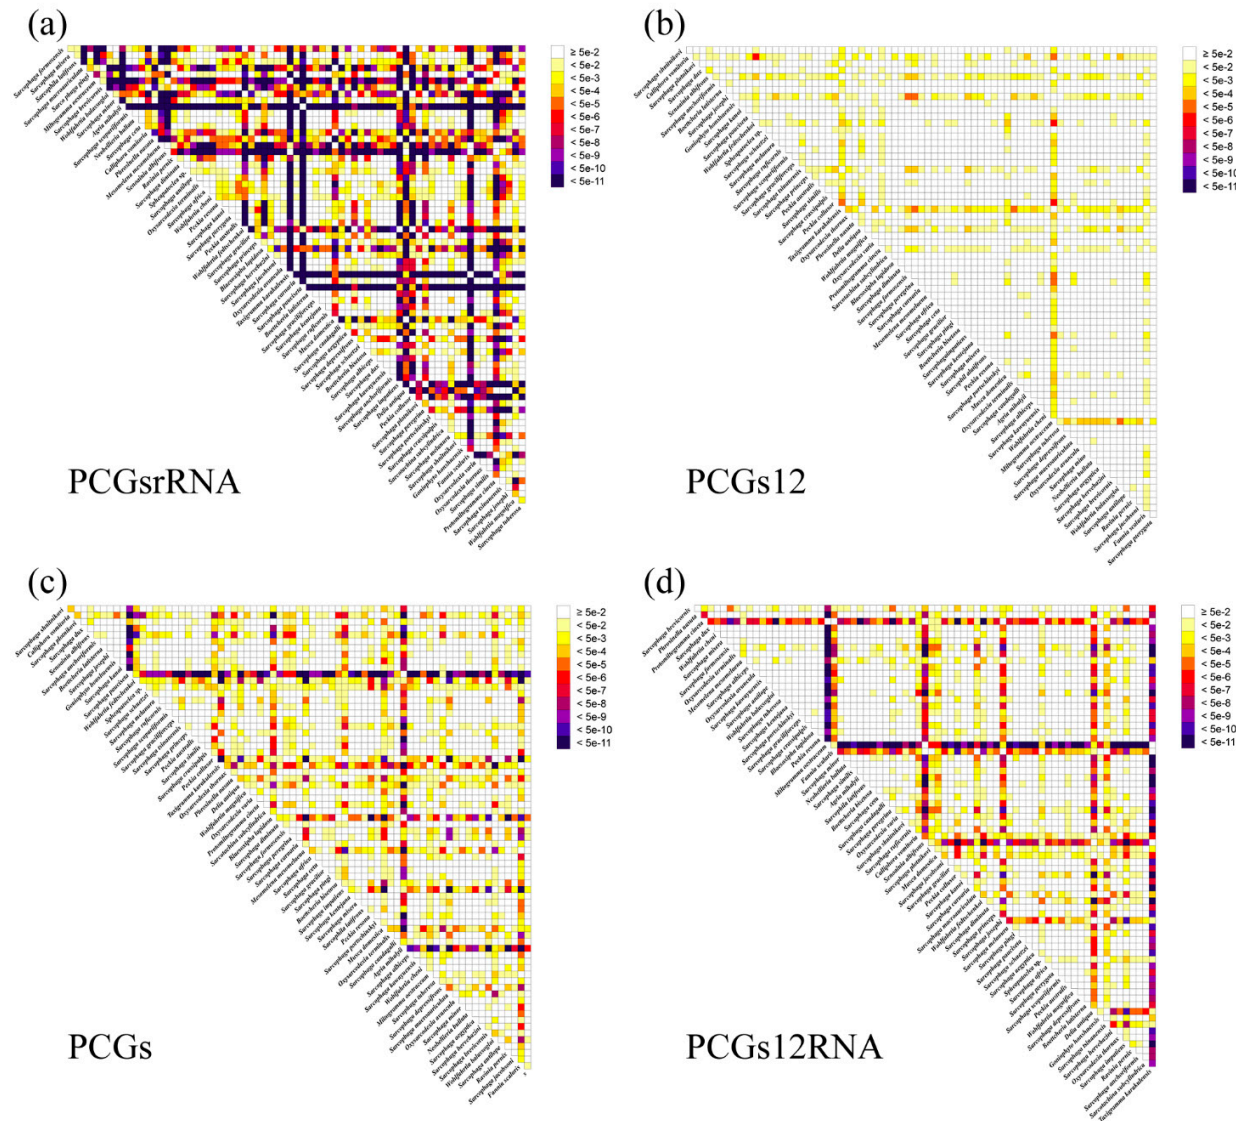

**Figure S3.** Heatmaps showing pairwise heterogeneous sequence divergence of matrices used for phylogenetic analyses. Abbreviations: PCGs+rRNA (a), all 13 protein-coding genes and two rRNA; PCGs12 (b), 1<sup>st</sup>- and 2<sup>nd</sup>- codon positions of the 13 protein-coding genes; PCGs (c), all 13 protein-coding genes; PCGs12+rRNA (d), 1<sup>st</sup>- and 2<sup>nd</sup>- codon positions of the 13 protein-coding genes and two rRNA.

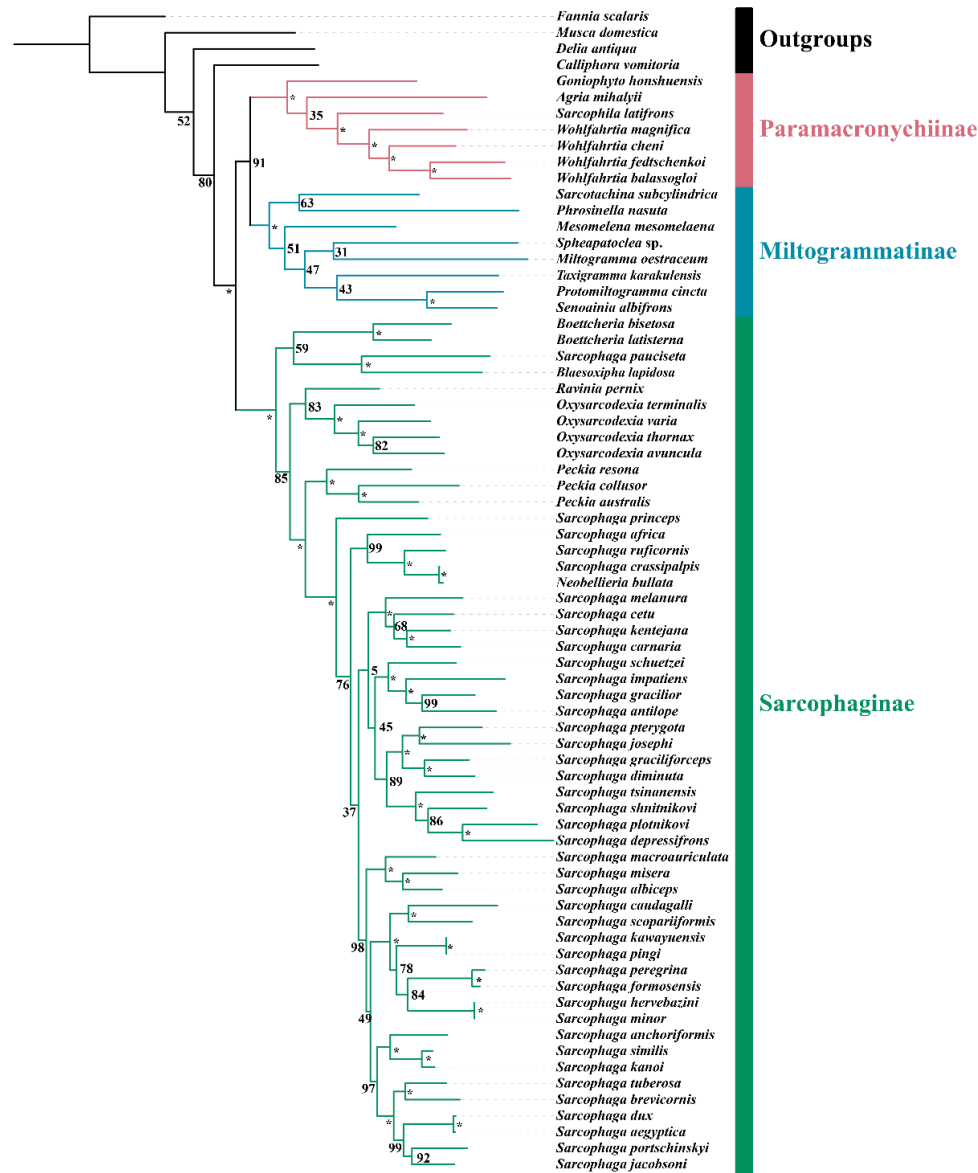

**Figure S4.** Maximum likelihood phylogenetic tree for Sarcophagidae based on concatenation of 13 mitochondrial protein-coding genes and two rRNA genes. Each node is provided with the support values of Maximum Likelihood bootstrap values (BS) for tree inference using matrix PCGsrRNA. Asterisks (\*) represent full support.

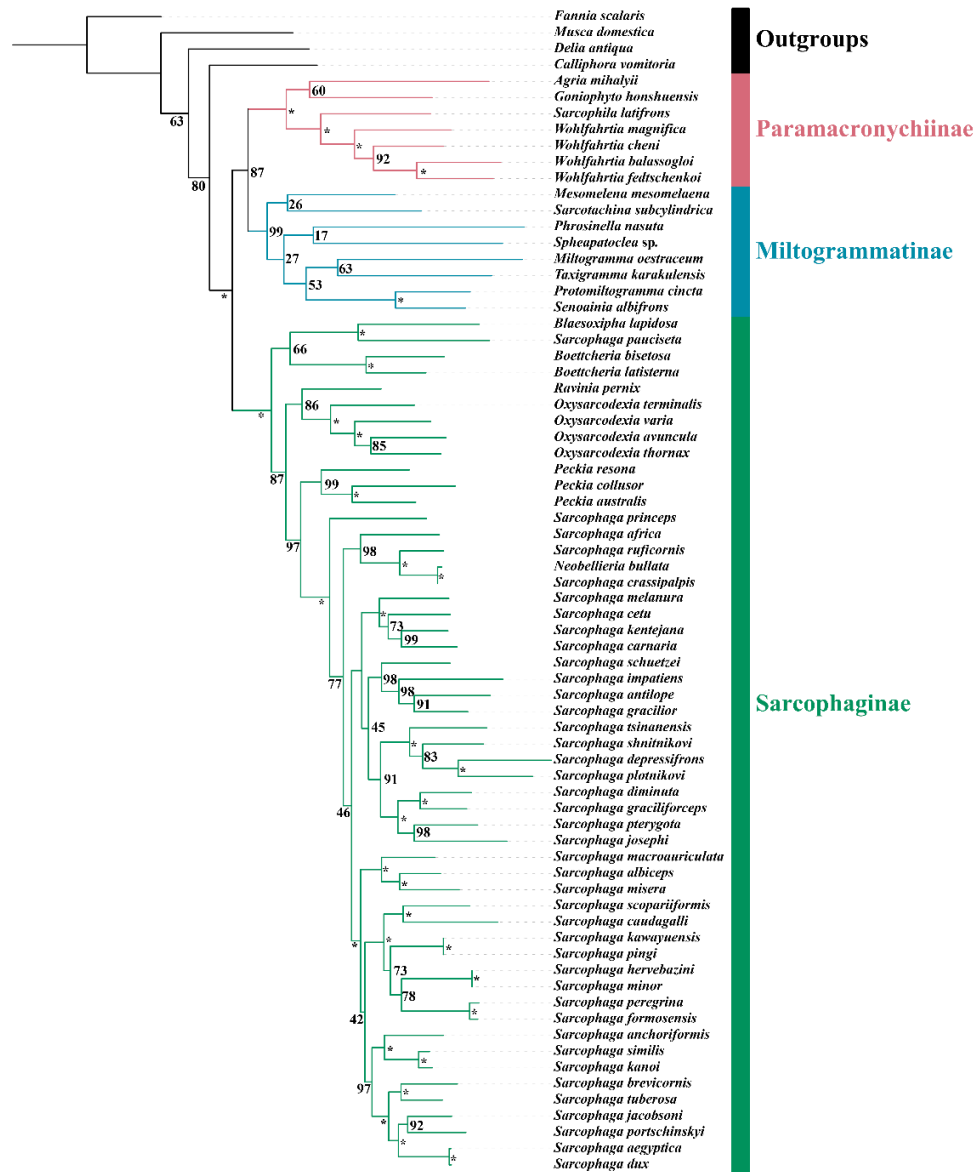

**Figure S5.** Maximum likelihood phylogenetic tree for Sarcophagidae based on concatenation of 13 mitochondrial protein-coding genes. Each node is provided with the support values of Maximum Likelihood bootstrap values (BS) for tree inference using matrix PCGs. Asterisks (\*) represent full support.

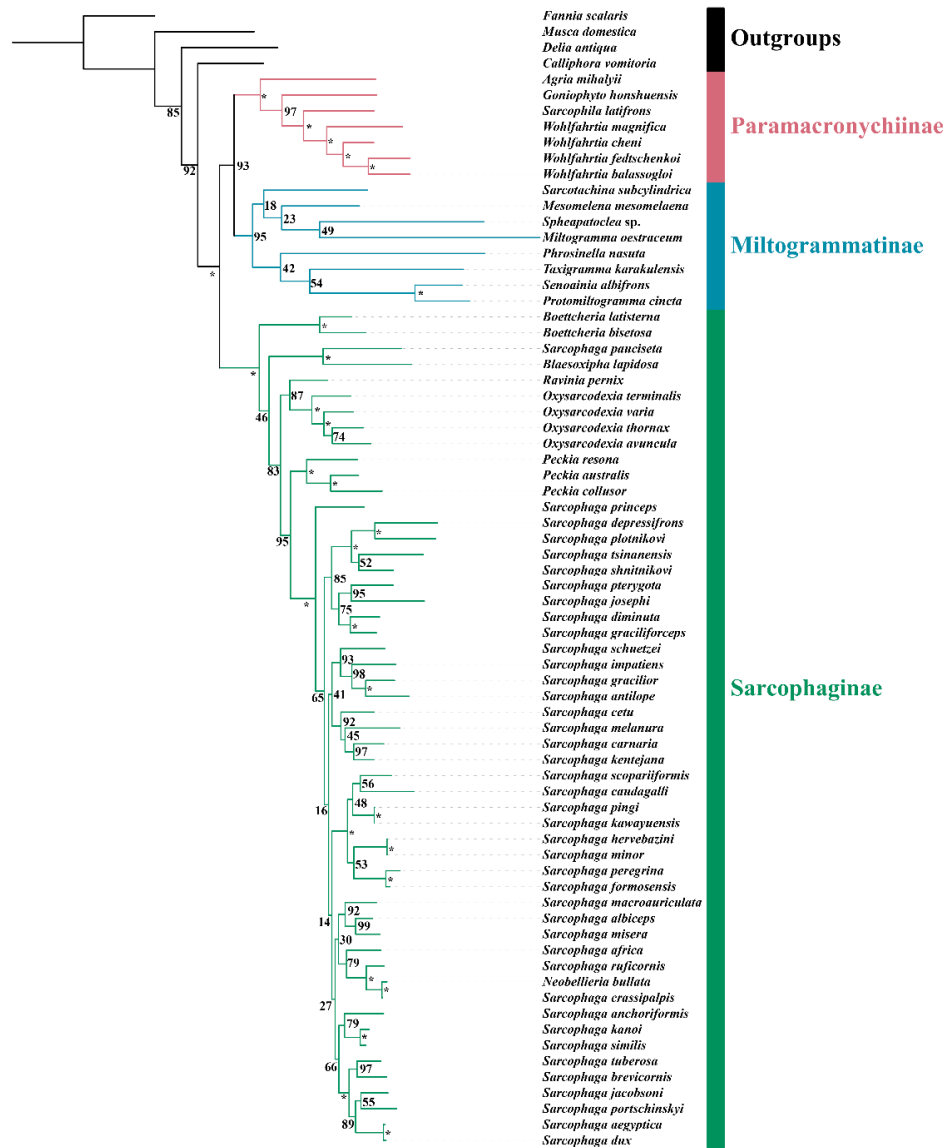

**Figure S6.** Maximum likelihood phylogenetic tree for Sarcophagidae based on concatenation of 13 mitochondrial protein-coding genes excluding 3rd-codon positions and two rRNA genes. Each node is provided with the support values of Maximum Likelihood bootstrap values (BS) for tree inference using matrix PCGs12rRNA. Asterisks (\*) represent full support.

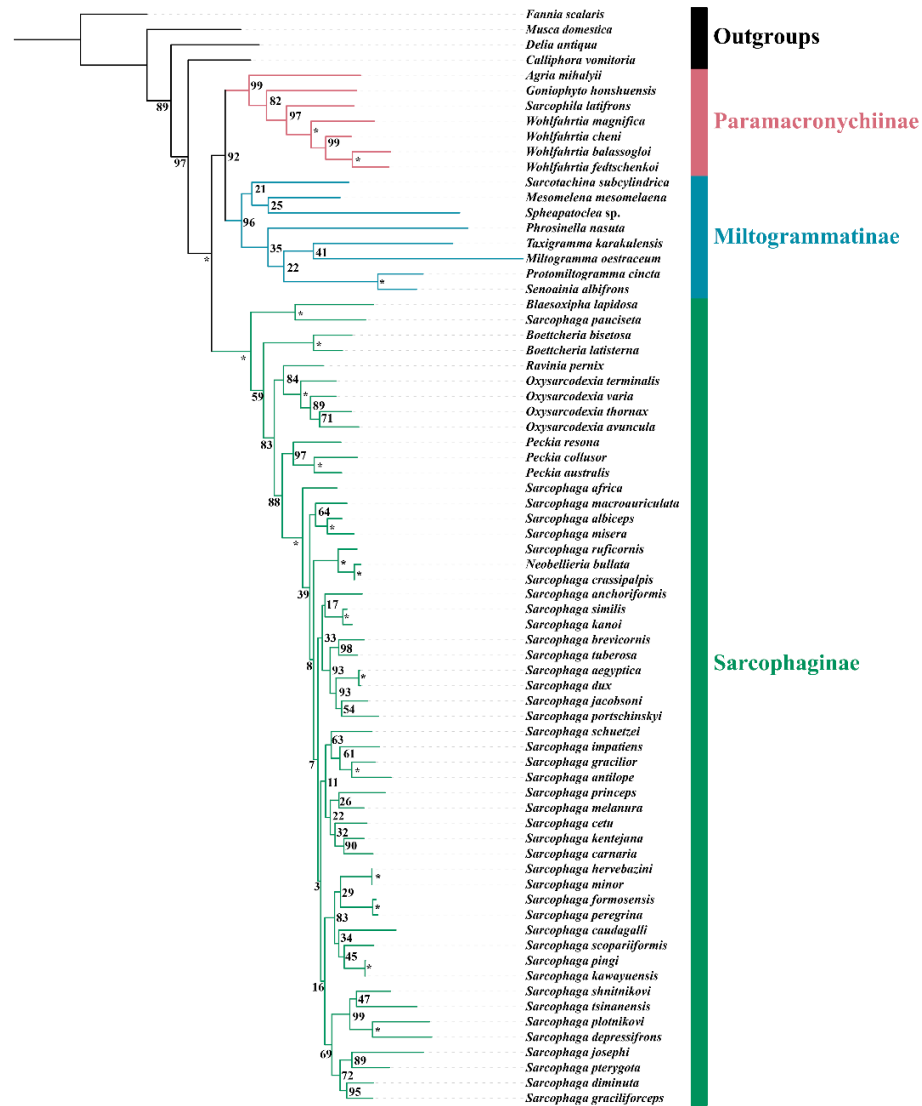

**Figure S7.** Maximum likelihood phylogenetic tree for Sarcophagidae based on concatenation of 13 mitochondrial protein-coding genes excluding 3rd-codon positions. Each node is provided with the support values of Maximum Likelihood bootstrap values (BS) for tree inference using matrix PCGs12. Asterisks (\*) represent full support.

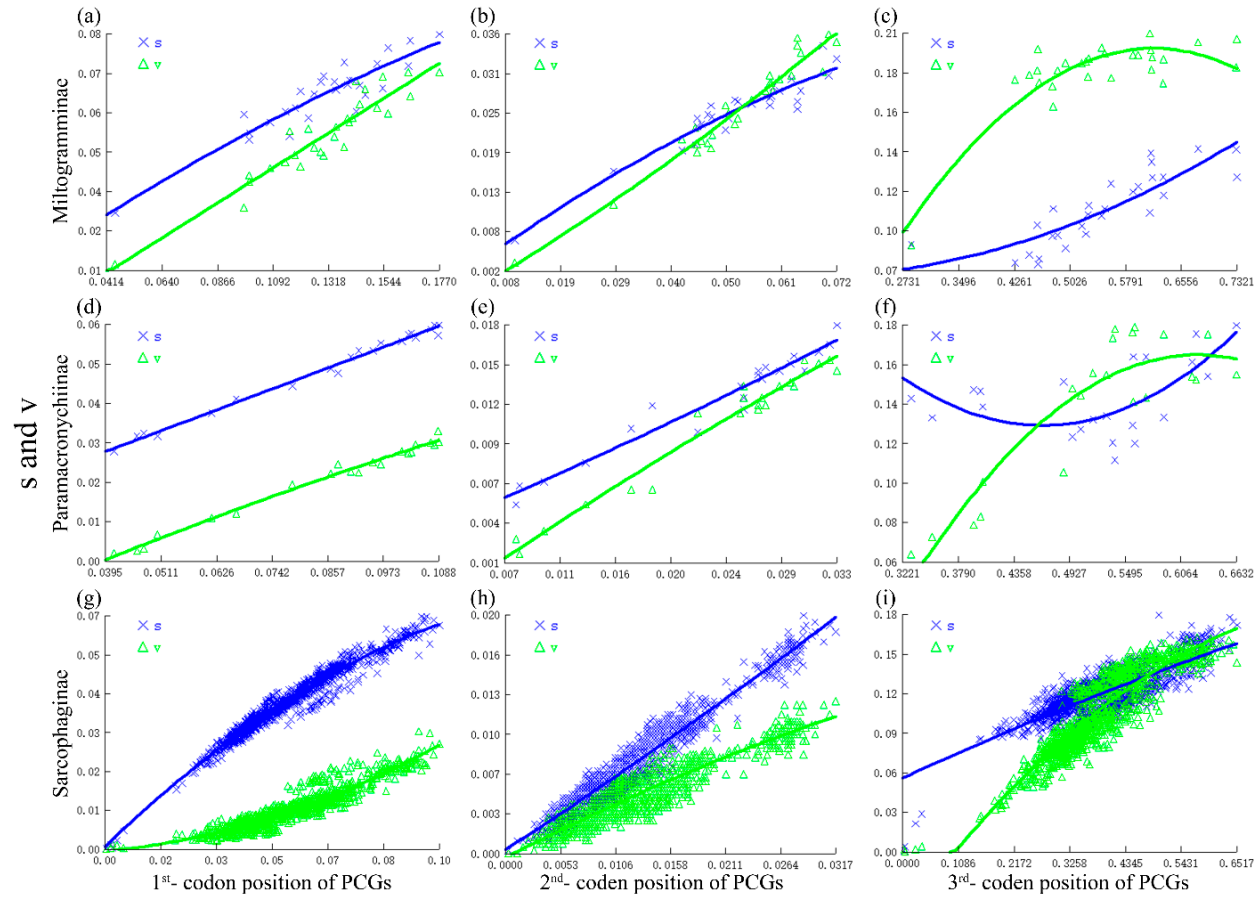

**Figure S8.** Nucleotide substitution saturation plots of all the 13 PCGs of three subfamilies based on 1<sup>st</sup>-, 2<sup>nd</sup>-, and 3<sup>rd</sup>- codon positions (a, b, c: Miltogrammatinae; d, e, f: Paramacronychiinae; g, h, i: Sarcophaginae). Transition and transversion are represented by blue and green plots, respectively.



**Table S1.** Collection information of specimens of flesh flies used for DNA extraction in this study.

| <b>Species</b>                  | <b>Collection Location</b>                | <b>Collection Time</b> |
|---------------------------------|-------------------------------------------|------------------------|
| <i>Agria mihalyii</i>           | Songshan, Beijing, China                  | 5-Jun-16               |
| <i>Blaesoxipha lapidosa</i>     | Kalamaili Nature Reserve, Xinjiang, China | 1-Jul-15               |
| <i>Taxigramma karakulensis</i>  | Kalamaili Nature Reserve, Xinjiang, China | 29-Apr-16              |
| <i>Wohlfahrtia balassogloi</i>  | Kalamaili Nature Reserve, Xinjiang, China | 23-Apr-15              |
| <i>Wohlfahrtia fedtschenkoi</i> | Kalamaili Nature Reserve, Xinjiang, China | 16-May-15              |

**Table S2.** The sequence characteristics of mitochondrial genome of flesh flies.

| <i>Agria_mihalyii</i>           |            |                           |                | <i>Blaesoxipha_campestris</i> |            |                           |                | <i>Taxigramma_karakulensis</i> |            |                           |                | <i>Wohlfahrtia_balassogloi</i> |            |                           |                | <i>Wohlfahrtia_fedtschenkoi</i> |            |                           |                |                     |
|---------------------------------|------------|---------------------------|----------------|-------------------------------|------------|---------------------------|----------------|--------------------------------|------------|---------------------------|----------------|--------------------------------|------------|---------------------------|----------------|---------------------------------|------------|---------------------------|----------------|---------------------|
| Gene                            | Stran<br>d | Locatio<br>n <sup>a</sup> | Length(b<br>p) | Codon                         | Stran<br>d | Locatio<br>n <sup>a</sup> | Length(b<br>p) | Codon                          | Stran<br>d | Locatio<br>n <sup>a</sup> | Length(b<br>p) | Codon                          | Stran<br>d | Locatio<br>n <sup>a</sup> | Length(b<br>p) | Codon                           | Stran<br>d | Locatio<br>n <sup>a</sup> | Length(b<br>p) | Codon               |
|                                 |            |                           |                | Start/A<br>nti Stop           |            |                           |                | Start/A<br>nti Stop            |            |                           |                | Start/A<br>nti Stop            |            |                           |                | Start/A<br>nti Stop             |            |                           |                | Start/A<br>nti Stop |
| tRNA <sup>II</sup> <sub>c</sub> | +          | 1-66                      | 66             | AAT                           | +          | 1-66                      | 66             | AGT                            | +          | 1-65                      | 66             | AAT                            | +          | 1-66                      | 66             | AAT                             |            | 1-66                      | 66             | AAT                 |
| tRNA <sub>Gln</sub>             | -          | 64-132                    | 69             | TAT                           | -          | 64-132                    | 69             | TAT                            | -          | 63-131                    | 69             | TAT                            | -          | 64-132                    | 69             | TAT                             | -          | 64-132                    | 69             | TAT                 |
| tRNA <sub>Met</sub>             | +          | 132-200                   | 69             | AAA                           | +          | 135-203                   | 69             | AAA                            | +          | 131-199                   | 69             | AAA                            | +          | 135-203                   | 69             | AAA                             | +          | 140-208                   | 69             | AAA                 |
| ND2                             | +          | 201-1217                  | 1017           | ATT/TA<br>A                   | +          | 204-1220                  | 1017           | ATT/TA<br>A                    | +          | 200-1216                  | 1017           | ATT/TA<br>A                    | +          | 204-1220                  | 1017           | ATT/TA<br>A                     | +          | 209-1225                  | 1017           | ATT/TA<br>A         |
| tRNA <sub>Trp</sub>             | +          | 1216-1283                 | 68             | AAG                           | +          | 1219-1286                 | 68             | AAG                            | +          | 1215-1281                 | 67             | AAG                            | +          | 1219-1286                 | 68             | AAG                             | +          | 1224-1291                 | 68             | AAG                 |
| tRNA <sub>Cys</sub>             | -          | 1276-1338                 | 63             | GGC                           | -          | 1279-1342                 | 64             | AGC                            | -          | 1274-1335                 | 62             | GGC                            | -          | 1279-1341                 | 63             | GGC                             | -          | 1284-1348                 | 65             | GGC                 |
| tRNA <sup>T</sup> <sub>yr</sub> | -          | 1352-1417                 | 66             | GAT                           | -          | 1351-1416                 | 66             | GAT                            | -          | 1349-1413                 | 65             | GAT                            | -          | 1350-1415                 | 66             | GAT                             | -          | 1357-1422                 | 66             | GAT                 |
| COI                             | +          | 1416-2949                 | 1534           | TCG/T                         | +          | 1415-2948                 | 1534           | TCG/T                          | +          | 1412-2945                 | 1534           | TCG/T                          | +          | 1414-2947                 | 1534           | TCG/T                           | +          | 1421-2954                 | 1534           | TCG/T               |
| tRNA <sub>Leu</sub>             | +          | 2950-3015                 | 66             | TCT                           | +          | 2949-3014                 | 66             | TCT                            | +          | 2946-3011                 | 66             | TCT                            | +          | 2948-3013                 | 66             | TCT                             | +          | 2955-3020                 | 66             | TCT                 |
| COII                            | +          | 3023-3710                 | 688            | ATG/C<br>TT                   | +          | 3019-3703                 | 685            | ATG/T                          | +          | 3015-3699                 | 685            | ATG/T                          | +          | 3019-3706                 | 688            | ATG/T                           | +          | 3026-3713                 | 688            | ATG/T               |
| tRNA <sub>Lys</sub>             | +          | 3711-3780                 | 70             | CAT                           | +          | 3707-3777                 | 71             | CAT                            | +          | 3703-3773                 | 71             | CAT                            | +          | 3707-3776                 | 70             | CAT                             | +          | 3714-3784                 | 71             | CAT                 |
| tRNA <sub>Asp</sub>             | +          | 3781-3847                 | 67             | AAA                           | +          | 3777-3843                 | 67             | AAA                            | +          | 3783-3847                 | 65             | AAA                            | +          | 3777-3844                 | 68             | AAA                             | +          | 3785-3851                 | 67             | AAA                 |
| ATP8                            | +          | 3848-4012                 | 165            | ATT/TA<br>A                   | +          | 3844-4008                 | 165            | ATT/TA<br>A                    | +          | 3848-4012                 | 165            | ATT/TA<br>A                    | +          | 3845-4006                 | 162            | ATC/T<br>AA                     | +          | 3851-4012                 | 162            | ATC/T<br>AA         |
| ATP6                            | +          | 4006-4683                 | 678            | ATG/T<br>AA                   | +          | 4002-4679                 | 678            | ATG/T<br>AA                    | +          | 4006-4677                 | 672            | ATG/T<br>AA                    | +          | 4000-4677                 | 678            | ATG/T<br>AA                     | +          | 4006-4683                 | 678            | ATG/T<br>AA         |
| COIII                           | +          | 4683-5471                 | 789            | ATG/T<br>AA                   | +          | 4679-5467                 | 789            | ATG/T<br>AA                    | +          | 4677-5465                 | 789            | ATG/T<br>AA                    | +          | 4677-5465                 | 789            | ATG/T<br>AA                     | +          | 4683-5471                 | 789            | ATG/T<br>AA         |
| tRNA <sub>Gly</sub>             | +          | 5478-5542                 | 65             | ATC                           | +          | 5474-5538                 | 65             | ATC                            | +          | 5468-5532                 | 65             | ATT                            | +          | 5468-5532                 | 65             | ATC                             | +          | 5478-5542                 | 65             | ATC                 |
| ND3                             | +          | 5543-5896                 | 354            | ATT/TA<br>A                   | +          | 5536-5892                 | 357            | ATA/T<br>AA                    | +          | 5533-5886                 | 354            | ATT/TA<br>A                    | +          | 5533-5886                 | 354            | ATT/TA<br>A                     | +          | 5543-5896                 | 354            | ATT/TA<br>A         |
| tRNA <sub>Ala</sub>             | +          | 5921-5988                 | 65             | AGG                           | +          | 5895-5959                 | 65             | AGG                            | +          | 5887-5949                 | 63             | AGG                            | +          | 5889-5952                 | 64             | AGG                             | +          | 5899-5963                 | 65             | AGG                 |
| tRNA <sub>Arg</sub>             | +          | 5989-6051                 | 63             | GAA                           | +          | 5959-6022                 | 64             | GAA                            | +          | 5950-6013                 | 64             | GAA                            | +          | 5953-6015                 | 63             | GAA                             | +          | 5964-6026                 | 63             | AAT                 |
| tRNA <sub>Asn</sub>             | +          | 6052-6116                 | 65             | TTA                           | +          | 6024-6088                 | 65             | TTA                            | +          | 6015-6078                 | 64             | TTA                            | +          | 6017-6081                 | 65             | TTA                             | +          | 6026-6090                 | 65             | TTA                 |

|             |   |                 |      |             |   |                 |      |             |   |                 |      |             |   |                 |      |             |   |                 |      |             |
|-------------|---|-----------------|------|-------------|---|-----------------|------|-------------|---|-----------------|------|-------------|---|-----------------|------|-------------|---|-----------------|------|-------------|
| tRNA<br>Ser | + | 6117-<br>6184   | 68   | GAA         | + | 6088-<br>6157   | 70   | AGA         | + | 6079-<br>6146   | 68   | GAA         | + | 6082-<br>6149   | 68   | GAA         | + | 6091-<br>6158   | 68   | GAA         |
| tRNA<br>Glu | + | 6185-<br>6251   | 67   | ATT         | + | 6157-<br>6222   | 66   | ATT         | + | 6154-<br>6218   | 65   | ATT         | + | 6151-<br>6217   | 67   | GTT         | + | 6159-<br>6226   | 68   | ATT         |
| tRNA<br>Phe | - | 6270-<br>6335   | 66   | ATT         | - | 6241-<br>6306   | 66   | ATT         | - | 6237-<br>6303   | 67   | ATT         | - | 6236-<br>6300   | 65   | ATT         | - | 6245-<br>6309   | 65   | ATT         |
| ND5         | - | 6336-<br>8055   | 1720 | ATT/T       | - | 6307-<br>8023   | 1717 | ATT/T       | - | 6304-<br>8023   | 1720 | ATT/T       | - | 6301-<br>8020   | 1720 | ATC/T       | - | 6310-<br>8029   | 1720 | ATC/T       |
| tRNA<br>His | - | 8071-<br>8134   | 64   | ATT         | - | 8039-<br>8101   | 63   | TTA         | - | 8039-<br>8102   | 64   | ATT         | - | 8036-<br>8101   | 66   | ATT         | - | 8040-<br>8105   | 66   | AAT         |
| ND4         | - | 8133-<br>9473   | 1341 | ATG/T<br>AT | - | 8104-<br>9442   | 1339 | ATG/T       | - | 8101-<br>9441   | 1341 | ATG/T<br>AT | - | 8102-<br>9440   | 1339 | ATG/T       | - | 8111-<br>9449   | 1339 | ATG/T       |
| ND4L        | - | 9467-<br>9763   | 297  | ATG/T<br>AA | - | 9436-<br>9732   | 297  | ATG/T<br>AA | - | 9435-<br>9731   | 297  | ATG/T<br>AA | - | 9434-<br>9730   | 297  | ATG/T<br>AA | - | 9443-<br>9739   | 297  | ATG/T<br>AA |
| tRNA<br>Thr | + | 9766-<br>9830   | 65   | GTT         | + | 9735-<br>9799   | 65   | GTT         | + | 9734-<br>9798   | 65   | GTT         | + | 9733-<br>9797   | 65   | GTT         | + | 9742-<br>9806   | 65   | GTT         |
| tRNA<br>Pro | - | 9831-<br>9896   | 66   | CAA         | - | 9800-<br>9864   | 65   | CAA         | - | 9799-<br>9863   | 65   | CAA         | - | 9798-<br>9863   | 66   | CAA         | - | 9807-<br>9872   | 66   | CAA         |
| ND6         | + | 9899-<br>10423  | 525  | ATT/TA<br>A | + | 9867-<br>10391  | 525  | ATT/TA<br>A | + | 9866-<br>10390  | 525  | ATT/TA<br>A | + | 9866-<br>10390  | 525  | ATT/TA<br>A | + | 9875-<br>10399  | 525  | ATT/TA<br>A |
| CYTB        | + | 10423-<br>11559 | 1137 | ATG/T<br>AG | + | 10391-<br>11527 | 1137 | ATG/T<br>AG | + | 10390-<br>11526 | 1137 | ATG/T<br>AG | + | 10390-<br>11526 | 1137 | ATG/T<br>AG | + | 10399-<br>11535 | 1137 | ATG/T<br>AG |
| tRNA<br>Ser | + | 11558-<br>11625 | 68   | AGT         | + | 11526-<br>11593 | 68   | AGT         | + | 11525-<br>11589 | 65   | AGT         | + | 11525-<br>11592 | 68   | AGT         | + | 11534-<br>11601 | 68   | AGT         |
| ND1         | - | 11642-<br>12580 | 939  | ATA/T<br>AA | - | 11610-<br>12548 | 939  | ATA/T<br>AA | - | 11611-<br>12531 | 921  | ATA/T<br>AA | - | 11609-<br>12547 | 939  | ATA/T<br>AA | - | 11618-<br>12556 | 939  | ATA/T<br>AA |
| tRNA<br>Leu | - | 12591-<br>12654 | 64   | ACT         | - | 12559-<br>12623 | 65   | GCT         | - | 12545-<br>12609 | 65   | ACT         | - | 12558-<br>12623 | 66   | ACT         | - | 12567-<br>12632 | 66   | ACT         |
| lrRNA       | - | 12651-<br>13979 | 1329 |             | - | 12620-<br>13947 | 1328 |             | - | 12606-<br>13934 | 1329 |             | - | 12621-<br>13944 | 1324 |             | - | 12632-<br>13953 | 1322 |             |
| tRNA<br>Val | - | 13976-<br>14047 | 72   | CAA         | - | 13948-<br>14019 | 72   | CAA         | - | 13935-<br>14006 | 72   | CAA         | - | 13945-<br>14016 | 72   | CAA         | - | 13954-<br>14025 | 72   | CAA         |
| srRN<br>A   | - | 14048-<br>14830 | 783  |             | - | 14020-<br>14804 | 785  |             | - | 14007-<br>14790 | 784  |             | - | 14017-<br>14800 | 784  |             | - | 14026-<br>14815 | 790  |             |

<sup>a</sup>Strand indicates the strand by which the genes are encoded; plus (+) and minus (-) symbols represent major and minor strands, respectively.

**Table S3.** Nucleotide composition of the mitogenomes of flesh flies.

| Dataset        | Species                         | A%    | T%    | AT%   | AT Skew | G%    | C%    | GC%   | GC Skew |
|----------------|---------------------------------|-------|-------|-------|---------|-------|-------|-------|---------|
| Whole genome   | <i>Agria mihalyii</i>           | 38.51 | 35.92 | 74.43 | 0.03    | 9.91  | 15.66 | 25.57 | -0.23   |
|                | <i>Blaesoxipha lapidosa</i>     | 39.06 | 36.11 | 75.17 | 0.04    | 9.52  | 15.31 | 24.83 | -0.23   |
|                | <i>Taxigramma karakulensis</i>  | 40.08 | 39.07 | 79.15 | 0.01    | 8.68  | 12.17 | 20.85 | -0.17   |
|                | <i>Wohlfahrtia balassogloi</i>  | 38.66 | 37.36 | 76.02 | 0.02    | 9.16  | 14.82 | 23.98 | -0.24   |
|                | <i>Wohlfahrtia fedtschenkoi</i> | 38.74 | 37.19 | 75.93 | 0.02    | 9.25  | 14.82 | 24.07 | -0.23   |
| All codon      | <i>Agria mihalyii</i>           | 29.84 | 41.97 | 71.81 | -0.17   | 13.61 | 14.58 | 28.19 | -0.03   |
|                | <i>Blaesoxipha lapidosa</i>     | 31.26 | 42.02 | 73.28 | -0.15   | 13.22 | 13.50 | 26.72 | -0.01   |
|                | <i>Taxigramma karakulensis</i>  | 32.62 | 44.39 | 77.01 | -0.15   | 11.62 | 11.36 | 22.99 | 0.01    |
|                | <i>Wohlfahrtia balassogloi</i>  | 30.91 | 42.43 | 73.34 | -0.16   | 13.02 | 13.64 | 26.66 | -0.02   |
|                | <i>Wohlfahrtia fedtschenkoi</i> | 30.80 | 42.35 | 73.15 | -0.16   | 13.06 | 13.79 | 26.85 | -0.03   |
| tRNA           | <i>Agria mihalyii</i>           | 38.98 | 37.13 | 76.11 | 0.02    | 11.47 | 12.42 | 23.89 | -0.04   |
|                | <i>Blaesoxipha lapidosa</i>     | 38.16 | 37.88 | 76.04 | 0.00    | 12.08 | 11.88 | 23.96 | 0.01    |
|                | <i>Taxigramma karakulensis</i>  | 38.80 | 38.80 | 77.60 | 0.00    | 11.03 | 11.37 | 22.40 | -0.02   |
|                | <i>Wohlfahrtia balassogloi</i>  | 38.98 | 37.41 | 76.38 | 0.02    | 11.54 | 12.08 | 23.62 | -0.02   |
|                | <i>Wohlfahrtia fedtschenkoi</i> | 38.80 | 37.58 | 76.38 | 0.02    | 11.64 | 11.98 | 23.62 | -0.01   |
| lrRNA          | <i>Agria mihalyii</i>           | 39.95 | 41.46 | 81.41 | -0.02   | 12.26 | 6.32  | 18.59 | 0.32    |
|                | <i>Blaesoxipha lapidosa</i>     | 39.53 | 41.72 | 81.25 | -0.03   | 12.58 | 6.17  | 18.75 | 0.34    |
|                | <i>Taxigramma karakulensis</i>  | 39.80 | 42.96 | 82.77 | -0.04   | 11.21 | 6.02  | 17.23 | 0.30    |
|                | <i>Wohlfahrtia balassogloi</i>  | 39.80 | 41.16 | 80.97 | -0.02   | 12.61 | 6.42  | 19.03 | 0.33    |
|                | <i>Wohlfahrtia fedtschenkoi</i> | 39.49 | 41.07 | 80.56 | -0.02   | 12.78 | 6.66  | 19.44 | 0.32    |
| srRNA          | <i>Agria mihalyii</i>           | 36.91 | 39.59 | 76.50 | -0.04   | 15.58 | 7.92  | 23.50 | 0.33    |
|                | <i>Blaesoxipha lapidosa</i>     | 37.45 | 39.62 | 77.07 | -0.03   | 15.54 | 7.39  | 22.93 | 0.36    |
|                | <i>Taxigramma karakulensis</i>  | 41.07 | 38.90 | 79.97 | 0.03    | 12.63 | 7.40  | 20.03 | 0.26    |
|                | <i>Wohlfahrtia balassogloi</i>  | 37.24 | 38.65 | 75.89 | -0.02   | 15.43 | 8.67  | 24.11 | 0.28    |
|                | <i>Wohlfahrtia fedtschenkoi</i> | 37.59 | 38.86 | 76.46 | -0.02   | 15.19 | 8.35  | 23.54 | 0.29    |
| Control region | <i>Agria mihalyii</i>           | 42.33 | 41.04 | 83.37 | 0.02    | 7.51  | 9.13  | 16.63 | -0.10   |
|                | <i>Blaesoxipha lapidosa</i>     | 49.07 | 39.75 | 88.82 | 0.10    | 3.42  | 7.76  | 11.18 | -0.39   |
|                | <i>Taxigramma karakulensis</i>  | 47.40 | 42.44 | 89.85 | 0.06    | 3.65  | 6.50  | 10.15 | -0.28   |
|                | <i>Wohlfahrtia balassogloi</i>  | 44.61 | 43.60 | 88.21 | 0.01    | 3.86  | 7.94  | 11.79 | -0.35   |
|                | <i>Wohlfahrtia fedtschenkoi</i> | 46.12 | 42.01 | 88.13 | 0.05    | 3.99  | 7.88  | 11.87 | -0.33   |
